# Supplementary material
Source: publisher figshare collection journal article supplement (https://acs.figshare.com/ndownloader/files/26973920)
Supplement: Supplementary file 1 [file 26973920]

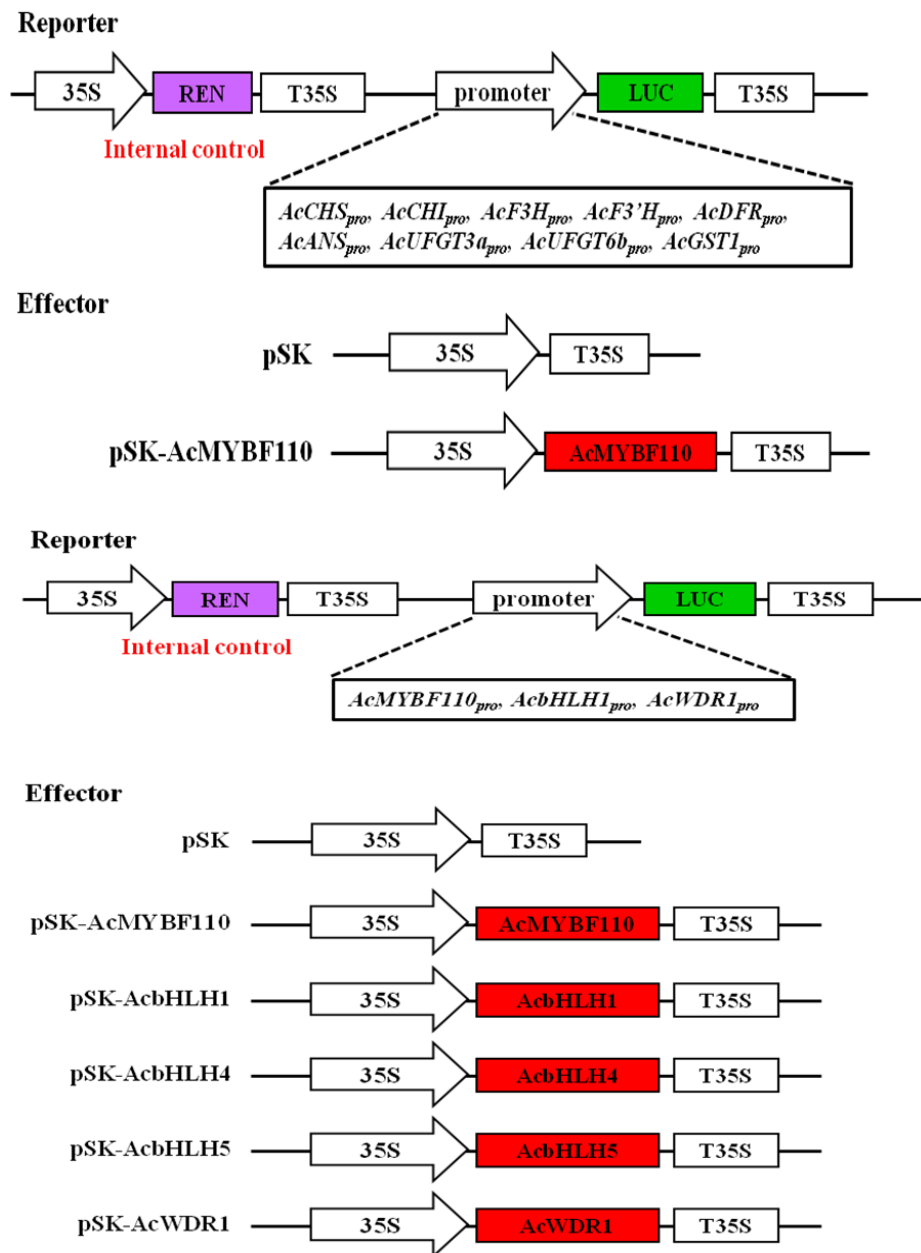

Fig. S1 Schematic diagrams of vectors used for the dual-luciferase assay.

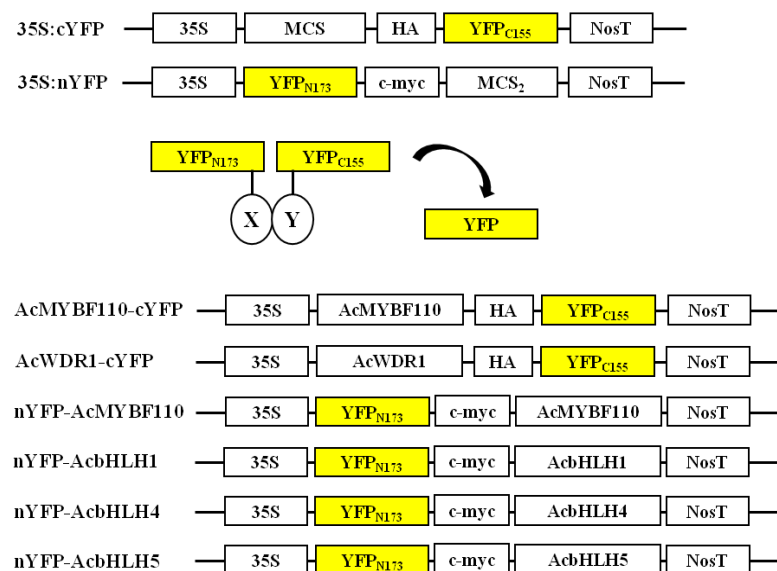

Fig. S2 Schematic diagrams of vectors used for the BiFC assay.

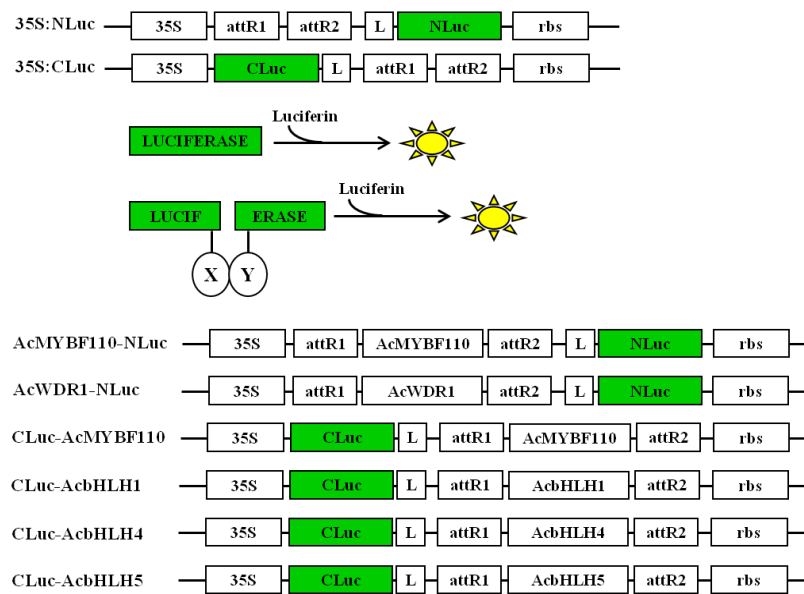

Fig. S3 Schematic diagrams of vectors used for the firefly luciferase complementation assay.

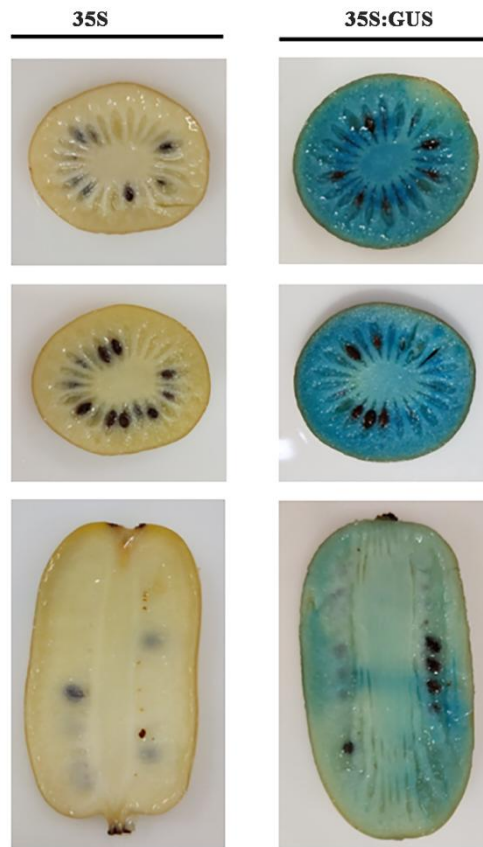

Fig. S4 GUS staining of *A. arguta* fruit injected with 35S or 35S:GUS at 48 h after injection.

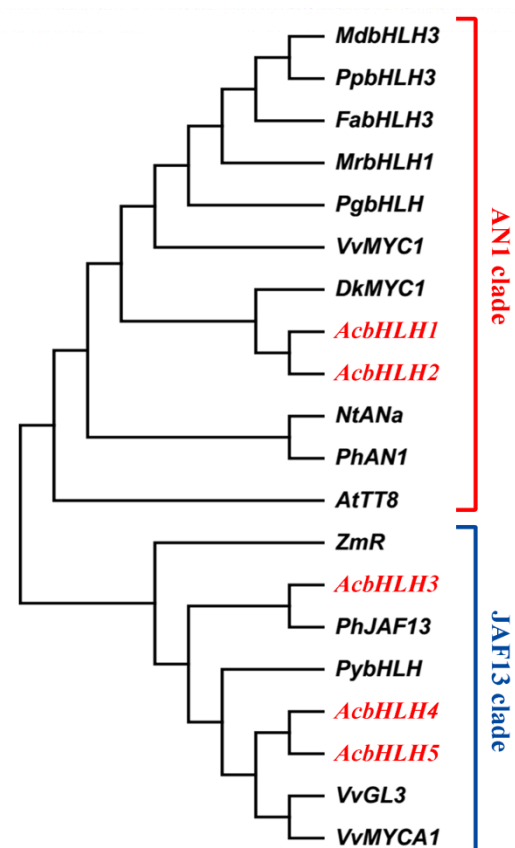

Fig. S5 Phylogenetic analyses of selected plants anthocyanin regulating bHLH transcription factors and putative kiwifruit factors.

1. 本行在 2017 年 12 月 31 日及 2018 年 12 月 31 日，均符合《公司法》及《证券法》规定的上市条件。

[illegible]

|         |                                                                                                       |                       |    |
|---------|-------------------------------------------------------------------------------------------------------|-----------------------|----|
| AcbHLH1 | ...HPTGVTSTGHHGHHLESSSSAGGACIMSSG...GHWFRPSC...HHHQADACG...HLLHLLVDFG...EDNDFSSA...TAADSSVFFPT...FQLE | SAHHLAARLRGRZNFNFILRS | 50 |
| AcbHLH2 | ...HPTGVTSTGHHGHHLESSSSAGGACIMSSG...GHWFRPSC...HHHQADACG...HLLHLLVDFG...EDNDFSSA...TAADSSVFFPT...FQLE | SAHHLAARLRGRZNFNFILRS | 51 |
| AcbHLH3 | ...HPTGVTSTGHHGHHLESSSSAGGACIMSSG...GHWFRPSC...HHHQADACG...HLLHLLVDFG...EDNDFSSA...TAADSSVFFPT...FQLE | SAHHLAARLRGRZNFNFILRS | 52 |
| AcbHLH4 | ...HPTGVTSTGHHGHHLESSSSAGGACIMSSG...GHWFRPSC...HHHQADACG...HLLHLLVDFG...EDNDFSSA...TAADSSVFFPT...FQLE | SAHHLAARLRGRZNFNFILRS | 53 |
| AcbHLH5 | ...HPTGVTSTGHHGHHLESSSSAGGACIMSSG...GHWFRPSC...HHHQADACG...HLLHLLVDFG...EDNDFSSA...TAADSSVFFPT...FQLE | SAHHLAARLRGRZNFNFILRS | 54 |
| AITT8   | ...HPTGVTSTGHHGHHLESSSSAGGACIMSSG...GHWFRPSC...HHHQADACG...HLLHLLVDFG...EDNDFSSA...TAADSSVFFPT...FQLE | SAHHLAARLRGRZNFNFILRS | 55 |
| DMCMY1  | ...HPTGVTSTGHHGHHLESSSSAGGACIMSSG...GHWFRPSC...HHHQADACG...HLLHLLVDFG...EDNDFSSA...TAADSSVFFPT...FQLE | SAHHLAARLRGRZNFNFILRS | 56 |
| FAHLH3  | ...HPTGVTSTGHHGHHLESSSSAGGACIMSSG...GHWFRPSC...HHHQADACG...HLLHLLVDFG...EDNDFSSA...TAADSSVFFPT...FQLE | SAHHLAARLRGRZNFNFILRS | 57 |
| MAHLH1  | ...HPTGVTSTGHHGHHLESSSSAGGACIMSSG...GHWFRPSC...HHHQADACG...HLLHLLVDFG...EDNDFSSA...TAADSSVFFPT...FQLE | SAHHLAARLRGRZNFNFILRS | 58 |
| PhbAF13 | ...HPTGVTSTGHHGHHLESSSSAGGACIMSSG...GHWFRPSC...HHHQADACG...HLLHLLVDFG...EDNDFSSA...TAADSSVFFPT...FQLE | SAHHLAARLRGRZNFNFILRS | 59 |
| PphAF13 | ...HPTGVTSTGHHGHHLESSSSAGGACIMSSG...GHWFRPSC...HHHQADACG...HLLHLLVDFG...EDNDFSSA...TAADSSVFFPT...FQLE | SAHHLAARLRGRZNFNFILRS | 60 |
| VvGL3   | ...HPTGVTSTGHHGHHLESSSSAGGACIMSSG...GHWFRPSC...HHHQADACG...HLLHLLVDFG...EDNDFSSA...TAADSSVFFPT...FQLE | SAHHLAARLRGRZNFNFILRS | 61 |
| VvMYC1  | ...HPTGVTSTGHHGHHLESSSSAGGACIMSSG...GHWFRPSC...HHHQADACG...HLLHLLVDFG...EDNDFSSA...TAADSSVFFPT...FQLE | SAHHLAARLRGRZNFNFILRS | 62 |

VFFVTRDKSILGDTIEYKQLRKNIQLENRARQIEIDQ.....RSRSSG.....DPQRSGAKAATD.....RNKLRIVEASGG..AKG.KAVDSVAVATPPF.PAFFQ.FVAG.VGVQV

[illegible]



|      |                                                                                                                                                            |      |
|------|------------------------------------------------------------------------------------------------------------------------------------------------------------|------|
| b1-5 | ATGCGCGCTCCCCCTAGTACAGGGCTCAAGCACTGTATACAGACGGCGGTGCATCGGTGCATAGCACTTATAGCCCTCTTCGGCAGTTGTGTCTCCACACGAAGATCTTAGTATGGGGAGATGGGTATTACATAGGACATCAAGCA         | 150  |
| b42  | ATGCGCGCTCCCCCTAGTACAGGGCTCAAGCACTGTATACAGACGGCGGTGCATCGGTGCATAGCACTTATAGCCCTCTTCGGCAGTTGTGTCTCCACACGAAGATCTTAGTATGGGGAGATGGGTATTACATAGGACATCAAGCA         | 150  |
| b1-5 | AGGAAGACAGTATTACCAATAGAGCTCAGCGCGGAGGAGCGCTCTCTCCAAAGAACGCCAGCTGAGAGCACTATATGATTTCTCTCTCTGCGAGTCCAATCAGCCACAACGCGGCTTGTGGCCGCTTTTGCCCCGGAGGACTTG           | 300  |
| b42  | AGGAAGACAGTATTACCAATAGAGCTCAGCGCGGAGGAGCGCTCTCTCCAAAGAACGCCAGCTGAGAGCACTATATGATTTCTCTCTCTGCGAGTCCAATCAGCCACAACGCGGCTTGTGGCCGCTTTTGCCCCGGAGGACTTG           | 300  |
| b1-5 | ACGGAGTCCGAGTGGTTCTTACCTCATGTGTGTTCTCTCTCTCTCTCCCGGTGTGGATTACAGGAGAAACATACGCCAAGGAGCAGCATGTTTGGCTTACCGGAGCGAAGAGGTCGATAGCAAACTCTTTTCGAGAGGCATTCTT          | 450  |
| b42  | ACGGAGTCCGAGTGGTTCTTACCTCATGTGTGTTCTCTCTCTCTCTCCCGGTGTGGATTACAGGAGAAACATACGCCAAGGAGCAGCATGTTTGGCTTACCGGAGCGAAGAGGTCGATAGCAAACTCTTTTCGAGAGGCATTCTT          | 450  |
| b1-5 | GCCAGAGTGCTCTGGTGTACAGCTATAGTGTATTCTCTCTACTAGATGGATGCTTGGATGGTATACAGAAAGGTACAGAGAGATTTGGTTTCATTACCAAGATCAAGTCTCTTTATTATGATCACACCGCTCTCCACGGCGC             | 600  |
| b42  | GCCAGAGTGCTCTGGTGTACAGCTATAGTGTATTCTCTCTACTAGATGGATGCTTGGATGGTATACAGAAAGGTACAGAGAGATTTGGTTTCATTACCAAGATCAAGTCTCTTTATTATGATCACACCGCTCTCCACGGCGC             | 600  |
| b1-5 | AAGCGACCGCTCTCCGAGCACTCCACTGTGGCCAGCTCTCTCTGCTCAGCCCGGCTCTCACTCCGCTCCACTCCCGCTCAGTATGGCCCCCTCGACCGCCCATCTGCGGACCAACAAATCCAGATGGAGAGAAACAAGAACAA            | 750  |
| b42  | AAGCGACCGCTCTCCGAGCACTCCACTGTGGCCAGCTCTCTCTGCTCAGCCCGGCTCTCACTCCGCTCCACTCCCGCTCAGTATGGCCCCCTCGACCGCCCATCTGCGGACCAACAAATCCAGATGGAGAGAAACAAGAACAA            | 750  |
| b1-5 | GAACAAAGAAGATGACGATGACGACGATGACGATGACGACGAGAAAGAAGCCGAGTCAGACTCGGAAGCCACACCGGGCTCAACACGCGAGGCCCGAGAACCCTCGGTGGACCATGTGGCTGTGACGCGCGCGACGACGAGCTA           | 900  |
| b42  | GAACAAAGAAGATGACGATGACGACGATGACGATGACGACGAGAAAGAAGCCGAGTCAGACTCGGAAGCCACACCGGGCTCAACACGCGAGGCCCGAGAACCCTCGGTGGACCATGTGGCTGTGACGCGCGCGACGACGAGCTA           | 900  |
| b1-5 | ATGCAGCTCGAGATGTCAAGAGATATCCGCTCGGGTCAGCGATAGCGGGTGCATATACATGACCCGATTTTCAGTGTGGTGGCAGCAAGTGGCACCGCGGGATCAGCACACAGGATTTGACTGTTTATGGCGCAAGTCT                | 1050 |
| b42  | ATGCAGCTCGAGATGTCAAGAGATATCCGCTCGGGTCAGCGATAGCGGGTGCATATACATGACCCGATTTTCAGTGTGGTGGCAGCAAGTGGCACCGCGGGATCAGCACACAGGATTTGACTGTTTATGGCGCAAGTCT                | 1050 |
| b1-5 | ACTCCGCGGGGGCTCTCTTCGAGGACCTTTTGGGACAGAGTCTCCAGGACCACTACTTCAGGTGGGACTGGACTAGATTAATTAACGAGAAGCAGACGACACTACTCTCAACTCTCTCGACATTTCTCAGACCAATCAACCGGTGG         | 1200 |
| b42  | ACTCCGCGGGGGCTCTCTTCGAGGACCTTTTGGGACAGAGTCTCCAGGACCACTACTTCAGGTGGGACTGGACTAGATTAATTAACGAGAAGCAGACGACACTACTCTCAACTCTCTCGACATTTCTCAGACCAATCAACCGGTGG         | 1200 |
| b1-5 | TTGGAGTCTCTCATCTGTCGCGCGCGGGCTGGCTCATCTCTCCCAATCGTCTACTTCCAGATGGCTGGCTCTCGACCTTCGAGACACCAACAGCGCGAGCGGCACCTCTCAGTGGCTACTCAAAATACATCTCTCTCACCGTCCCG         | 1350 |
| b42  | TTGGAGTCTCTCATCTGTCGCGCGCGGGCTGGCTCATCTCTCCCAATCGTCTACTTCCAGATGGCTGGCTCTCGACCTTCGAGACACCAACAGCGCGAGCGGCACCTCTCAGTGGCTACTCAAAATACATCTCTCTCACCGTCCCG         | 1350 |
| b1-5 | TTCTCTCACTCAAGTACCGCGACGACAAACAATCCCCAAATCGCGACCGCTGCGGACTCGGCTCCGCTCTCGGACGCGAGCGCGCGAGGAGCTCAGCTCTCGGCCAATCAGTCTCTCGCGAGCGAGCGCGCGCGGAGAGCTCAG           | 1500 |
| b42  | TTCTCTCACTCAAGTACCGCGACGACAAACAATCCCCAAATCGCGACCGCTGCGGACTCGGCTCCGCTCTCGGACGCGAGCGCGCGAGGAGCTCAGCTCTCGGCCAATCAGTCTCTCGCGAGCGAGCGCGCGCGGAGAGCTCAG           | 1500 |
| b1-5 | GAGCGGCTTCATCATTTTCAGATCTCTAGTCCCTTTCTGCACCAAAATGGACAAGGCTCGATTCTGGGGGACAGCATCGAGTACTGAGCAATTCGCCAAAATATTCCGCAAAATATTCGAGAGCTAGGGCAGCTGATGATCGAAATCGATACAA | 1650 |
| b42  | GAGCGGCTTCATCATTTTCAGATCTCTAGTCCCTTTCTGCACCAAAATGGACAAGGCTCGATTCTGGGGGACAGCATCGAGTACTGAGCAATTCGCCAAAATATTCCGCAAAATATTCGAGAGCTAGGGCAGCTGATGATCGAAATCGATACAA | 1650 |
| b1-5 | CGATCCAGATCTCGGGGAGACCGGACAGGAGAGCGGCGCAAAAGCGGCGACAGCAAGAGAAATTAGAGATCTGGTGGAGCGAGCGAGGGGCAAGGGGAGGCGGTGGATTCGTCGGCGTGGCACTCCACCGCTCTCGGCGCGCGCG          | 1800 |
| b42  | CGATCCAGATCTCGGGGAGACCGGACAGGAGAGCGGCGCAAAAGCGGCGACAGCAAGAGAAATTAGAGATCTGGTGGAGCGAGCGAGGGGCAAGGGGAGGCGGTGGATTCGTCGGCGTGGCACTCCACCGCTCTCGGCGCGCGCG          | 1800 |
| b1-5 | CAGCGCGTGGCTGGATGGGTGTGCAGTGCAGGTGTCGATAATCAGAGAGCAGCGGCTGGTTGAGCTCGAGTGCAGCATAGGAGGGGTGGTTGCTGGAGATGATGGTGGTCTCGGACCAATCGGTTGGAGTCAACCGCGTGC              | 1950 |
| b42  | CAGCGCGTGGCTGGATGGGTGTGCAGTGCAGGTGTCGATAATCAGAGAGCAGCGGCTGGTTGAGCTCGAGTGCAGCATAGGAGGGGTGGTTGCTGGAGATGATGGTGGTCTCGGACCAATCGGTTGGAGTCAACCGCGTGC              | 1950 |
| b1-5 | TTCTCTGTGACCAATGGGATTTATTTGGCCGAGTTTGGGCGAAAGTGAAGAAAGAACTAAATGGAAAGAGCCAAATTTGTGGAAGTAAGAGAGCAATACACCAATCATACCCCTA                                        | 2069 |
| b42  | TTCTCTGTGACCAATGGGATTTATTTGGCCGAGTTTGGGCGAAAGTGAAGAAAGAACTAAATGGAAAGAGCCAAATTTGTGGAAGTAAGAGAGCAATACACCAATCATACCCCTA                                        | 2069 |

Fig. S7 Alignment of *AcbHLH1* and *AcbHLH42* sequences.

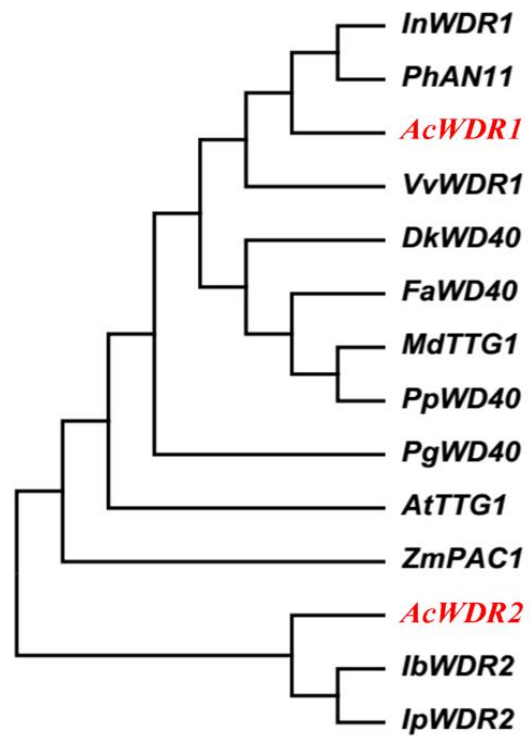

Fig. S8 Phylogenetic analyses of selected plants anthocyanin regulating WD40 transcription factors and putative kiwifruit factor *AcWDRs*.



|          |                                                                                                                                |     |
|----------|--------------------------------------------------------------------------------------------------------------------------------|-----|
| AcWDR1   | VESTQEEHLRS.....ENSVYDSEVFLYVAFSSARTFHH...HDAVSESEDEYNWDLISFD...PETILIRSNEN...GGEFYATKNG...HAAAS.LRKSALLASGGLRWKWRDNI.....E    | 119 |
| AcWDR2   | MGANSDFTCGDSDE..QQRSEITVEAFHHVYAMNVRCKK....YDAIISDDEYVWVEIVLID...DSNGEIRSDEN...GGEFYATKNG...HAAAS.LRKSALLASGGLRWKWRDNI.....E   | 121 |
| AtTTG1   | MENAPDS..LSRS.....ETAVYDSEVFLYVAFSLRSSG...HDAVSESEDEYNWDLISFD...DSMTVVFPLND...GGEFYATKNG...HAAAS.LRKSALLASGGLRWKWRDNI.....E    | 118 |
| DkWD40   | MENSLERHHRSS.....EHVYDSEVFLYVAFSLRSSG...HDAVSESEDEYNWDLISFD...DITLAIKRNAL...GGEFYATKNG...HAAAS.LRKSALLASGGLRWKWRDNI.....E      | 114 |
| FaWD40   | MENSLERHHRSS.....EHVYDSEVFLYVAFSLRSSG...HDAVSESEDEYNWDLISFD...DITLAIKRNAL...GGEFYATKNG...HAAAS.LRKSALLASGGLRWKWRDNI.....E      | 121 |
| ibWDR2   | MGANSDFTCGDSDE..QQRSEITVEAFHHVYAMNVRCKK....YDAIISDDEYVWVEIVLID...DSNGEIRSDEN...GGEFYATKNG...HAAAS.LRKSALLASGGLRWKWRDNI.....E   | 121 |
| InWDR1   | MENAPDS..LSRS.....ETAVYDSEVFLYVAFSLRSSG...HDAVSESEDEYNWDLISFD...DSMTVVFPLND...GGEFYATKNG...HAAAS.LRKSALLASGGLRWKWRDNI.....E    | 120 |
| IpWDR2   | MGANSDFTCGDSDE..QQRSEITVEAFHHVYAMNVRCKK....YDAIISDDEYVWVEIVLID...DSNGEIRSDEN...GGEFYATKNG...HAAAS.LRKSALLASGGLRWKWRDNI.....E   | 121 |
| MdTTG1   | MENAPDS..LSRS.....ETAVYDSEVFLYVAFSLRSSG...HDAVSESEDEYNWDLISFD...DSMTVVFPLND...GGEFYATKNG...HAAAS.LRKSALLASGGLRWKWRDNI.....E    | 119 |
| MrWD40-1 | MENAPDS..LSRS.....ETAVYDSEVFLYVAFSLRSSG...HDAVSESEDEYNWDLISFD...DSMTVVFPLND...GGEFYATKNG...HAAAS.LRKSALLASGGLRWKWRDNI.....E    | 119 |
| PgWD40   | MENAPDS..LSRS.....ETAVYDSEVFLYVAFSLRSSG...HDAVSESEDEYNWDLISFD...DSMTVVFPLND...GGEFYATKNG...HAAAS.LRKSALLASGGLRWKWRDNI.....E    | 111 |
| PhAN11   | MENAPDS..LSRS.....ETAVYDSEVFLYVAFSLRSSG...HDAVSESEDEYNWDLISFD...DSMTVVFPLND...GGEFYATKNG...HAAAS.LRKSALLASGGLRWKWRDNI.....E    | 114 |
| PpWD40   | MENAPDS..LSRS.....ETAVYDSEVFLYVAFSLRSSG...HDAVSESEDEYNWDLISFD...DSMTVVFPLND...GGEFYATKNG...HAAAS.LRKSALLASGGLRWKWRDNI.....E    | 119 |
| VvWDR1   | MENAPDS..LSRS.....ETAVYDSEVFLYVAFSLRSSG...HDAVSESEDEYNWDLISFD...DSMTVVFPLND...GGEFYATKNG...HAAAS.LRKSALLASGGLRWKWRDNI.....E    | 113 |
| ZmPAC1   | MEFPPFSSVASSSGPETPNFATCELRSTVLA...FVA.....FVLSSESEDEYNWDLISFD...FVPSAASFTAL...GGEFYATKNG...HAAAS.LRKSALLASGGLRWKWRDNI.....E    | 126 |
| AcWDR1   | ELSVLNNNS...EPCGPTSFENWDEFRNGTSIDITICTWD...IRGVETQLAHKRVVDIANGACVPSVSADGVSVFCLRC...KHSTIYES...EPTPLRLNNQDRYMATINDNNVLLDIRGHEV  | 258 |
| AcWDR2   | IKSLNNNS...EPCGPTSFENWDEFRNGTSIDITICTWD...IRGVETQLAHKRVVDIANGACVPSVSADGVSVFCLRC...KHSTIYES...EPTPLRLNNQDRYMATINDNNVLLDIRGHEV   | 260 |
| AtTTG1   | ELSVLNNNS...EPCGPTSFENWDEFRNGTSIDITICTWD...IRGVETQLAHKRVVDIANGACVPSVSADGVSVFCLRC...KHSTIYES...EPTPLRLNNQDRYMATINDNNVLLDIRGHEV  | 257 |
| DkWD40   | ELSVLNNNS...EPCGPTSFENWDEFRNGTSIDITICTWD...IRGVETQLAHKRVVDIANGACVPSVSADGVSVFCLRC...KHSTIYES...EPTPLRLNNQDRYMATINDNNVLLDIRGHEV  | 253 |
| FaWD40   | ELSVLNNNS...EPCGPTSFENWDEFRNGTSIDITICTWD...IRGVETQLAHKRVVDIANGACVPSVSADGVSVFCLRC...KHSTIYES...EPTPLRLNNQDRYMATINDNNVLLDIRGHEV  | 260 |
| ibWDR2   | IKSLNNNS...EPCGPTSFENWDEFRNGTSIDITICTWD...IRGVETQLAHKRVVDIANGACVPSVSADGVSVFCLRC...KHSTIYES...EPTPLRLNNQDRYMATINDNNVLLDIRGHEV   | 260 |
| InWDR1   | ELSVLNNNS...EPCGPTSFENWDEFRNGTSIDITICTWD...IRGVETQLAHKRVVDIANGACVPSVSADGVSVFCLRC...KHSTIYES...EPTPLRLNNQDRYMATINDNNVLLDIRGHEV  | 259 |
| IpWDR2   | IKSLNNNS...EPCGPTSFENWDEFRNGTSIDITICTWD...IRGVETQLAHKRVVDIANGACVPSVSADGVSVFCLRC...KHSTIYES...EPTPLRLNNQDRYMATINDNNVLLDIRGHEV   | 260 |
| MdTTG1   | ELSVLNNNS...EPCGPTSFENWDEFRNGTSIDITICTWD...IRGVETQLAHKRVVDIANGACVPSVSADGVSVFCLRC...KHSTIYES...EPTPLRLNNQDRYMATINDNNVLLDIRGHEV  | 258 |
| MrWD40-1 | ELSVLNNNS...EPCGPTSFENWDEFRNGTSIDITICTWD...IRGVETQLAHKRVVDIANGACVPSVSADGVSVFCLRC...KHSTIYES...EPTPLRLNNQDRYMATINDNNVLLDIRGHEV  | 258 |
| PgWD40   | ELSVLNNNS...EPCGPTSFENWDEFRNGTSIDITICTWD...IRGVETQLAHKRVVDIANGACVPSVSADGVSVFCLRC...KHSTIYES...EPTPLRLNNQDRYMATINDNNVLLDIRGHEV  | 250 |
| PhAN11   | ELSVLNNNS...EPCGPTSFENWDEFRNGTSIDITICTWD...IRGVETQLAHKRVVDIANGACVPSVSADGVSVFCLRC...KHSTIYES...EPTPLRLNNQDRYMATINDNNVLLDIRGHEV  | 253 |
| PpWD40   | ELSVLNNNS...EPCGPTSFENWDEFRNGTSIDITICTWD...IRGVETQLAHKRVVDIANGACVPSVSADGVSVFCLRC...KHSTIYES...EPTPLRLNNQDRYMATINDNNVLLDIRGHEV  | 258 |
| VvWDR1   | ELSVLNNNS...EPCGPTSFENWDEFRNGTSIDITICTWD...IRGVETQLAHKRVVDIANGACVPSVSADGVSVFCLRC...KHSTIYES...EPTPLRLNNQDRYMATINDNNVLLDIRGHEV  | 252 |
| ZmPAC1   | LSVLDLRFNS...EPCGPTSFENWDEFRNGTSIDITICTWD...IRGVETQLAHKRVVDIANGACVPSVSADGVSVFCLRC...KHSTIYES...EPTPLRLNNQDRYMATINDNNVLLDIRGHEV | 266 |
| AcWDR1   | FEIRHRSNNATWAFQSSPHECGGDCQALIND...TVAGEN...GDEMNYGASSED...QLQWRALEPWAIRFENRQDOK                                                | 341 |
| AcWDR2   | FEIRHRSNNATWAFQSSPHECGGDCQALIND...TVAGEN...GDEMNYGASSED...QLQWRALEPWAIRFENRQDOK                                                | 345 |
| AtTTG1   | FEIRHRSNNATWAFQSSPHECGGDCQALIND...TVAGEN...GDEMNYGASSED...QLQWRALEPWAIRFENRQDOK                                                | 340 |
| DkWD40   | FEIRHRSNNATWAFQSSPHECGGDCQALIND...TVAGEN...GDEMNYGASSED...QLQWRALEPWAIRFENRQDOK                                                | 336 |
| FaWD40   | FEIRHRSNNATWAFQSSPHECGGDCQALIND...TVAGEN...GDEMNYGASSED...QLQWRALEPWAIRFENRQDOK                                                | 343 |
| ibWDR2   | FEIRHRSNNATWAFQSSPHECGGDCQALIND...TVAGEN...GDEMNYGASSED...QLQWRALEPWAIRFENRQDOK                                                | 345 |
| InWDR1   | FEIRHRSNNATWAFQSSPHECGGDCQALIND...TVAGEN...GDEMNYGASSED...QLQWRALEPWAIRFENRQDOK                                                | 342 |
| IpWDR2   | FEIRHRSNNATWAFQSSPHECGGDCQALIND...TVAGEN...GDEMNYGASSED...QLQWRALEPWAIRFENRQDOK                                                | 345 |
| MdTTG1   | FEIRHRSNNATWAFQSSPHECGGDCQALIND...TVAGEN...GDEMNYGASSED...QLQWRALEPWAIRFENRQDOK                                                | 341 |
| MrWD40-1 | FEIRHRSNNATWAFQSSPHECGGDCQALIND...TVAGEN...GDEMNYGASSED...QLQWRALEPWAIRFENRQDOK                                                | 341 |
| PgWD40   | FEIRHRSNNATWAFQSSPHECGGDCQALIND...TVAGEN...GDEMNYGASSED...QLQWRALEPWAIRFENRQDOK                                                | 333 |
| PhAN11   | FEIRHRSNNATWAFQSSPHECGGDCQALIND...TVAGEN...GDEMNYGASSED...QLQWRALEPWAIRFENRQDOK                                                | 336 |
| PpWD40   | FEIRHRSNNATWAFQSSPHECGGDCQALIND...TVAGEN...GDEMNYGASSED...QLQWRALEPWAIRFENRQDOK                                                | 341 |
| VvWDR1   | FEIRHRSNNATWAFQSSPHECGGDCQALIND...TVAGEN...GDEMNYGASSED...QLQWRALEPWAIRFENRQDOK                                                | 335 |
| ZmPAC1   | FEIRHRSNNATWAFQSSPHECGGDCQALIND...TVAGEN...GDEMNYGASSED...QLQWRALEPWAIRFENRQDOK                                                | 352 |

Fig. S9 Amino acid sequences alignment of AcWDRs and other plant anthocyanin promoting WD40. Red boxes indicate four WD motifs.

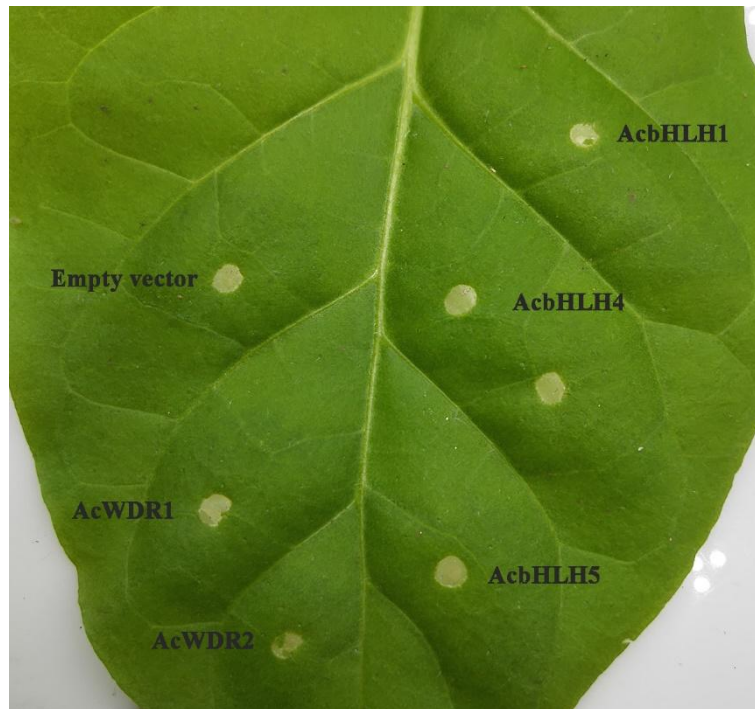

Fig. S10 The phenotype of tobacco leaves 7 days after infiltration with empty vector, *AcbHLH1*, *AcbHLH4*, *AcbHLH5*, *AcWDR1* and *AcWDR2*.

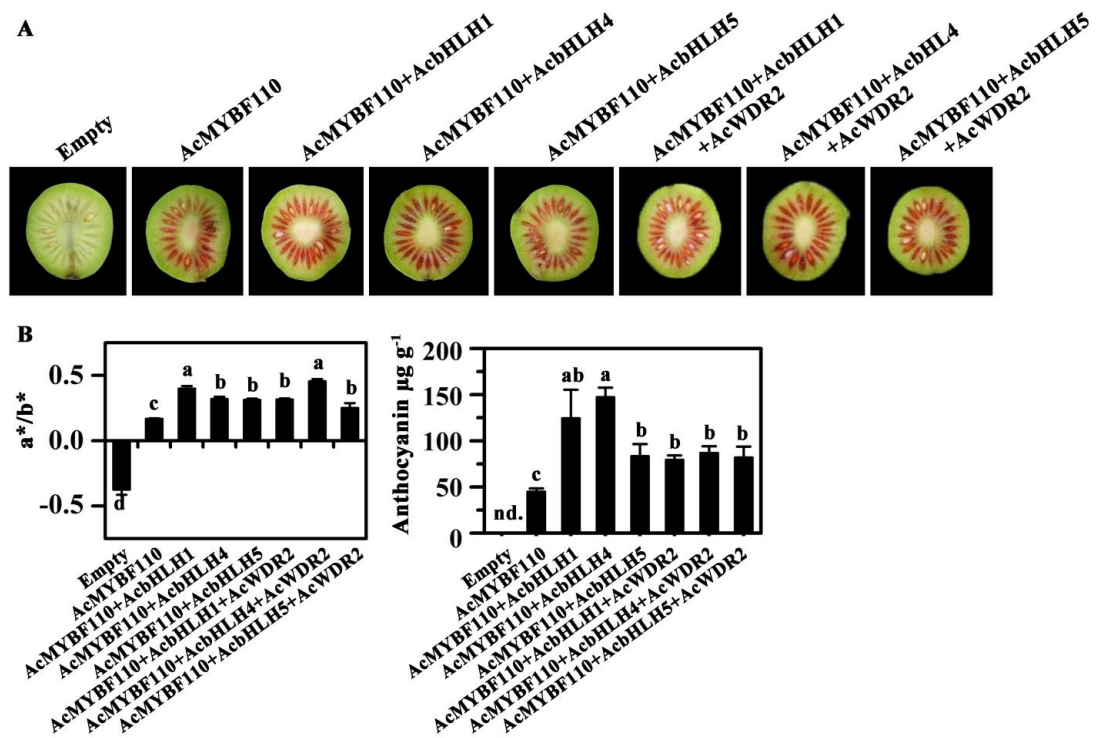

Fig. S11 The phenotype (A), color value (B) and anthocyanin contents (C) of *A. arguta* 10 days after infiltration with *AcMYBF110*, *AcbHLH1/4/5* and *AcWDR2*. Error bars show the SEs of the means ( $n = 3$ ). Lowercase letters indicate significant differences at  $P < 0.05$  (one-way ANOVA tests).
